# Supplementary material
Source: PubMed Central journal article supplement (PMC9989362)
Supplement: web_material_kwac059.pdf [file web_material_kwac059.pdf]

## WEB MATERIAL

### Where Is Air Quality Improving, and Who Benefits? A Study of PM<sub>2.5</sub> and Ozone Over 15 Years

**Authors:** Mercedes A. Bravo, Joshua L. Warren, Man Chong Leong, Nicole C. Deziel, Rachel T. Kimbro,  
Michelle L. Bell, Marie Lynn Miranda

#### Table of Contents

Web Appendix 1

Web Appendix 2

Web Tables 1-4

Web Figures 1-7

## Web Appendix 1

Racial isolation calculation. We calculate a previously developed local, spatial measure of RI of self-identifying non-Hispanic Black (NHB) individuals (compared with all other racial/ethnic groups, including Hispanics) in each tract for the continental US.<sup>1,2</sup> The index ranges from 0 to 1. NHB living in a neighborhood environment that is nearly all non-NHB will have a racial isolation value that is close to 0. In contrast, NHB living in a neighborhood environment that is nearly all NHB will have a racial isolation value that is close to 1.

$$RI_{im} = \left( \sum_{j \in \partial_i} w_{ij} T_{jm} \right) / \left( \sum_{j \in \partial_i} w_{ij} T_j \right)$$

In this equation,  $\partial_i$  denotes the set of index unit ( $i$ ) and its neighbors (i.e., tracts which are adjacent to the index tract). Given  $M$  mutually exclusive racial subgroups,  $m$  indexes the subgroups of  $M$  (e.g., NHB).  $T_i$  denotes the total population in region  $i$  and  $T_{im}$  denotes the population of subgroup  $m$  in region  $i$ .  $(w_{ij})$  denotes a  $n \times n$  first order adjacency matrix, where  $n$  is the number of census tracts in the study area. First order adjacency means that the entries in the matrix,  $w_{ij}$ , are set to 1 if a boundary is shared by region  $i$  and region  $j$ , and 0 otherwise. Entries of the main diagonal (since  $i \in \partial_i$ ,  $w_{ij} = w_{ii}$  when  $j = i$ ) of  $(w_{ij})$  are set to 1.5, such that the weight of the index unit,  $i$ , is larger than the weights assigned to adjacent tracts. Since we are more interested in the spatial patterns rather than the aspatial patterns,  $w_{ii}$  should not be set to too high. For neighbors of any index unit  $i$  with 0 population, the corresponding  $T_{jm}$  and  $T_j$  are 0, so that the value of  $RI_{im}$ , the RI index of unit  $i$  for subgroup  $m$ , would not be affected. We note that, in calculating spatial indices, edge tracts (e.g., tracts along a coastline) may have few neighboring tracts; index values in these tracts may be unstable.

## Web Appendix 2

Educational isolation calculation. We develop an analogous local, spatial measure of EI, assessing likelihood of living in the same neighborhood of individuals without a college degree to those with a college degree.<sup>3</sup> We calculate tract-level EI scores by accounting for the population composition in the index tract along with adjacent tracts.

$$EI_{im} = \left( \sum_{j \in \partial_i} w_{ij} T_{jm} \right) / \left( \sum_{j \in \partial_i} w_{ij} T_j \right)$$

In this equation, the value of  $EI_{im}$ , educational isolation index of unit  $i$  for subgroup  $m$ , is calculated in the same way as  $RI_{im}$ , except  $m$  indexes mutually exclusive subgroups of educational attainment categories (e.g., individuals with a four-year college degree, individuals without a four-year college degree). Note that the right-hand sides of equations for RI and EI are identical. These equations only differ in terms of how subgroup  $m$  is defined.

The resulting RI and EI indices range from 0 to 1, with values close to 0 indicating the neighborhood environment is almost entirely non-NHB or college educated, respectively. Values close to 1 indicate that the neighborhood is almost entirely NHB or non-college educated. We note that alternative categories for comparison could be chosen; for example, EI could be calculated comparing those without a high school degree to those with a high school degree.

**Web Table 1. Mean, standard deviation, minimum, and maximum of social/demographic variables**

| Variable                             | Mean (SD)   | Minimum, Maximum |
|--------------------------------------|-------------|------------------|
| Racial isolation (RI)                | 0.21 (0.17) | 0.003, 0.89      |
| Educational isolation (EI)           | 0.73 (0.15) | 0.22, 0.96       |
| Percent urban                        | 67.1 (30.1) | 0, 100           |
| Neighborhood deprivation index (NDI) | 0 (2.1)     | -5.11, 10.35     |

**Web Table 2. Correlations among social/demographic variables**

| Variable                             | RI | EI   | % urban | NDI    |
|--------------------------------------|----|------|---------|--------|
| Racial isolation (RI)                | 1  | 0.23 | 0.22    | 0.50   |
| Educational isolation (EI)           | -- | 1    | -0.46   | 0.58   |
| Percent urban                        | -- | --   | 1       | -0.050 |
| Neighborhood deprivation index (NDI) | -- | --   | --      | 1      |

**Web Table 3. Watanabe-Akaike Information Criterion (WAIC) values for null and adjusted models with and without random slopes<sup>4</sup>**

|                | PM <sub>2.5</sub>     |                    |
|----------------|-----------------------|--------------------|
|                | Without random slopes | With random slopes |
| Null model     | 90,946                | 90,384             |
| Adjusted model | 90,874                | 90,352             |
|                | O <sub>3</sub>        |                    |
|                | Without random slopes | With random slopes |
| Null model     | 174,447               | 174,447            |
| Adjusted model | 174,301               | 174,301            |

The adjusted models for both PM<sub>2.5</sub> and O<sub>3</sub> included all community-level characteristics (i.e., RI, EI, percent urban, and NDI); separate models were not fit for each community-level characteristic.

**Web Table 4. Values of random effect variances and spatial dependence parameters in null and adjusted models**

|                | PM <sub>2.5</sub>                |                                |                                |                              |
|----------------|----------------------------------|--------------------------------|--------------------------------|------------------------------|
|                | Random effect variance           |                                | Spatial dependence             |                              |
|                | Intercept<br>( $\tau_{\phi}^2$ ) | Slope<br>( $\tau_{\delta}^2$ ) | Intercept<br>( $\rho_{\phi}$ ) | Slope<br>( $\rho_{\delta}$ ) |
| Null model     | 1.93                             | 0.72                           | 0.30                           | 0.93                         |
| Adjusted model | 1.58                             | 0.69                           | 0.24                           | 0.93                         |
|                | O <sub>3</sub>                   |                                |                                |                              |
|                | Random effect variance           |                                | Spatial dependence             |                              |
|                | Intercept<br>( $\tau_{\phi}^2$ ) | Slope<br>( $\tau_{\delta}^2$ ) | Intercept<br>( $\rho_{\phi}$ ) | Slope<br>( $\rho_{\delta}$ ) |
| Null model     | 5.99                             | –                              | 0.48                           | –                            |
| Adjusted model | 5.37                             | –                              | 0.45                           | –                            |

The adjusted models for both PM<sub>2.5</sub> and O<sub>3</sub> included all community-level characteristics (i.e., RI, EI, percent urban, and NDI); separate models were not fit for each community-level characteristic.

Web Figure 1. Maps of tract-level downscaler-estimated PM<sub>2.5</sub> concentrations in 2002, 2009, and 2016

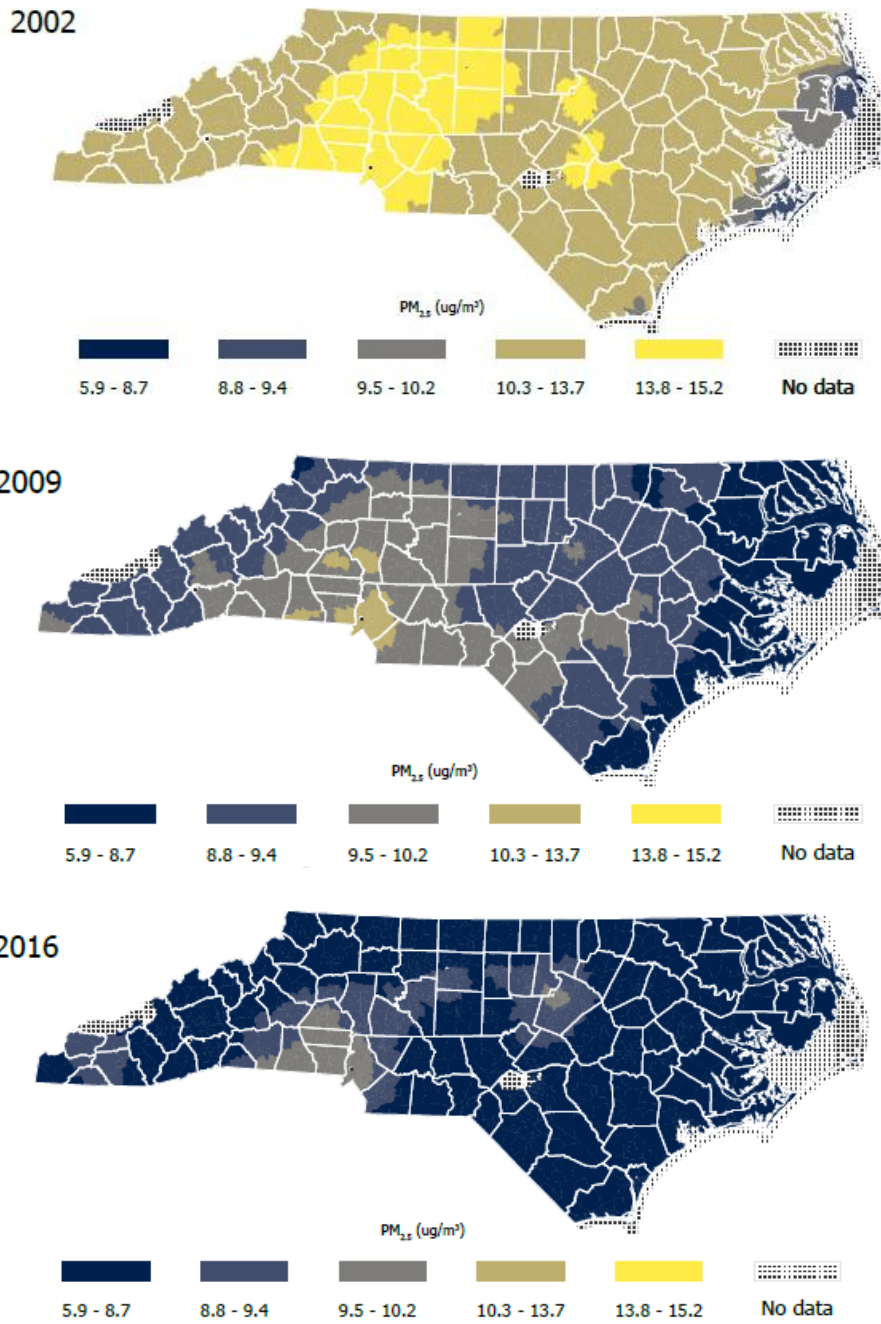

Web Figure 2. Maps of tract-level downscaler-estimated O<sub>3</sub> concentrations in 2002, 2009, and 2016

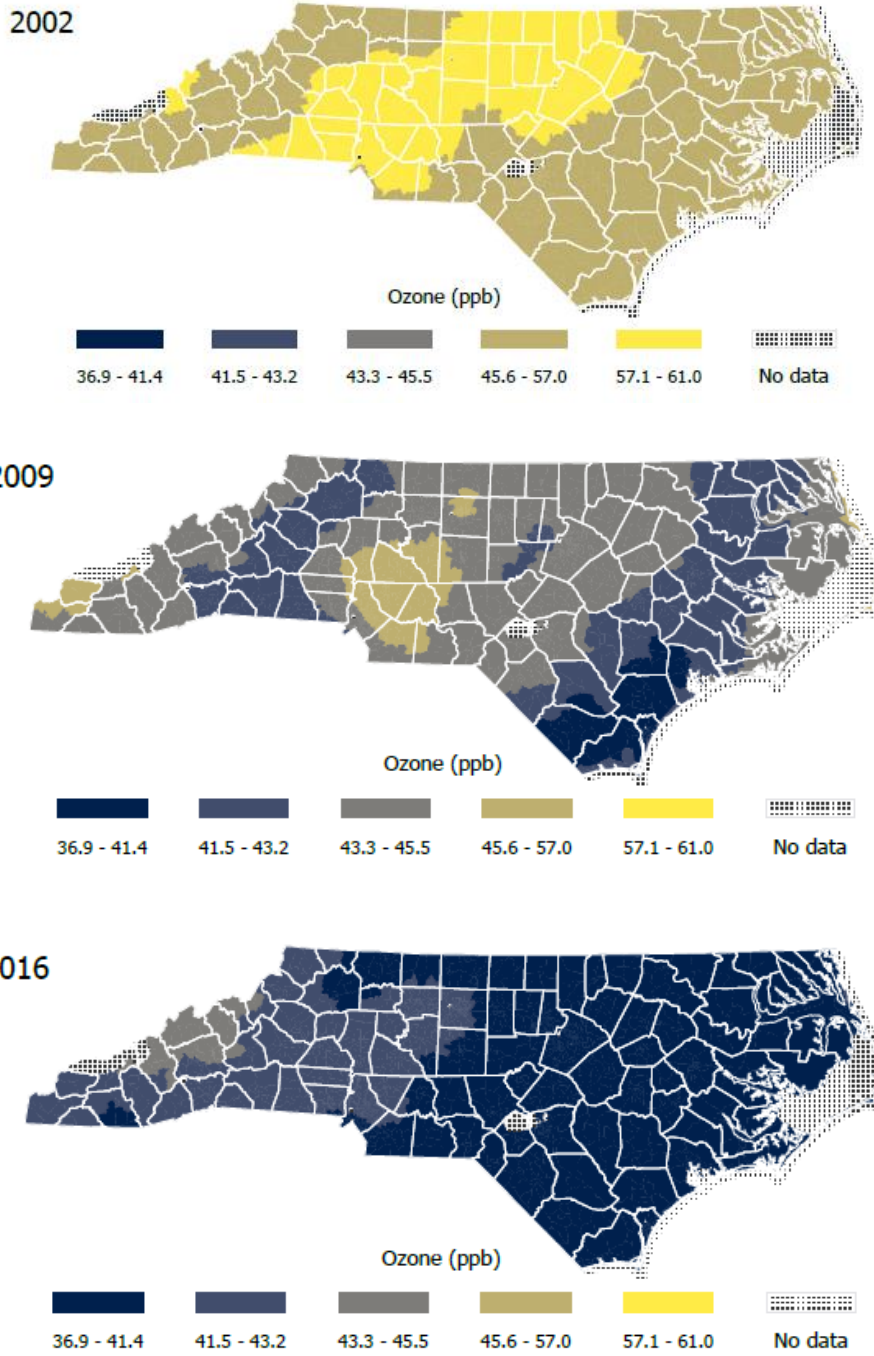

**Web Figure 3. Map of racial isolation (RI) of non-Hispanic Blacks (NHB)**

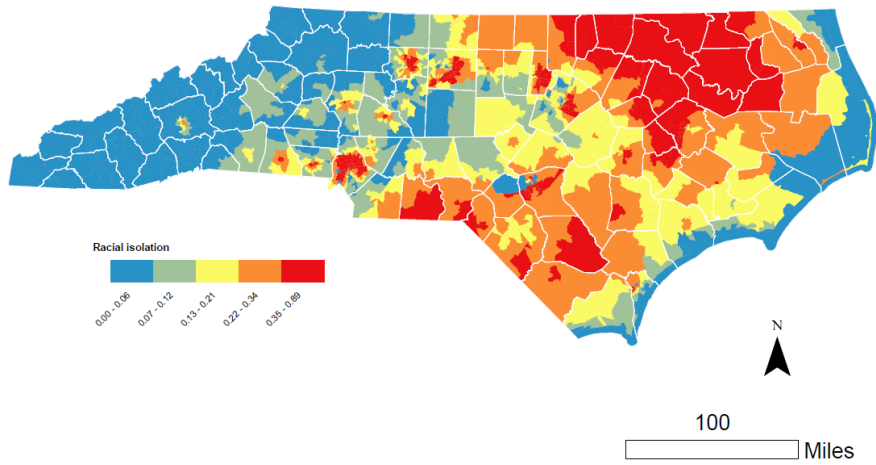

**Web Figure 4. Map of educational isolation (EI) of non-college educated individuals**

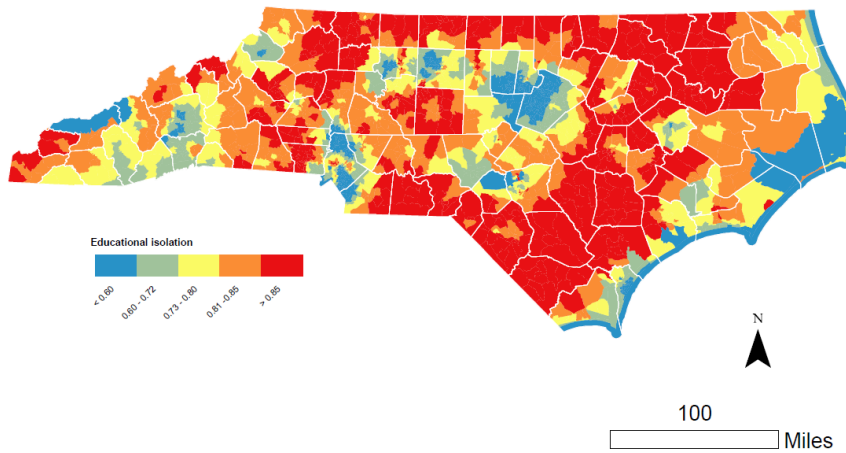

**Web Figure 5. Map of percentage of population in urban settings**

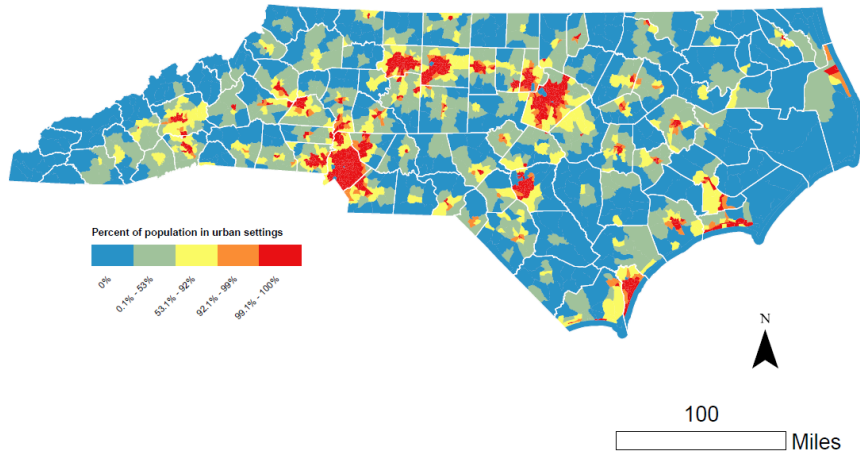

**Web Figure 6. Map of the neighborhood deprivation index (NDI)**

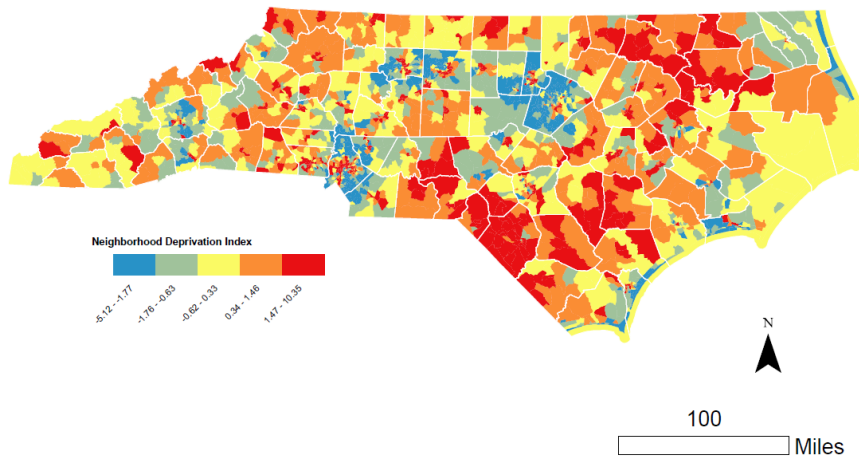

**Web Figure 7. Adjusted model, O<sub>3</sub>:** Tract-specific variations in change in O<sub>3</sub> concentration over the study period (2002 to 2016). Note that the range in O<sub>3</sub> concentrations is small.

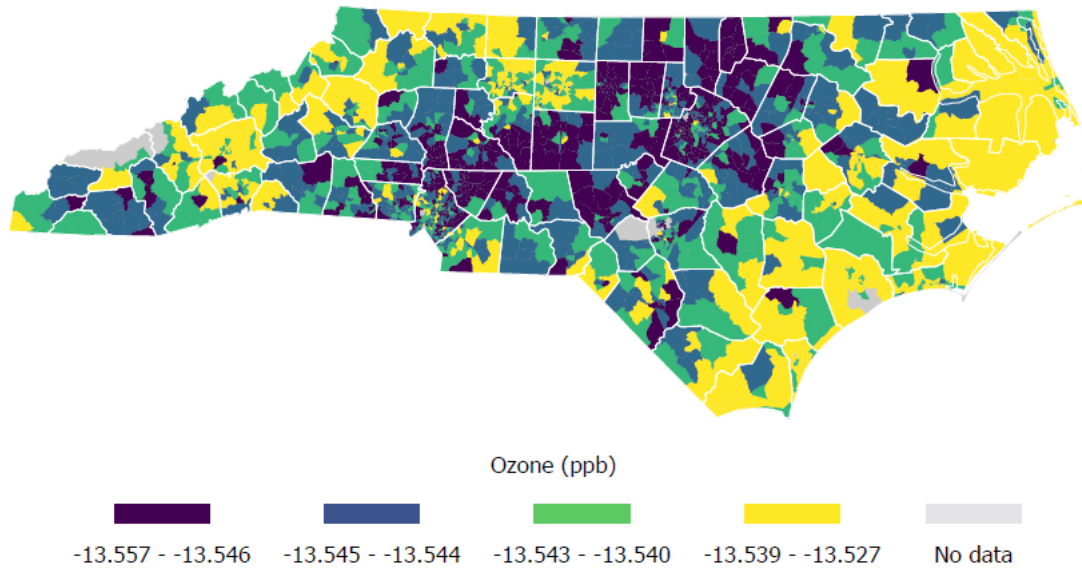



## Web References

1. Anthopolos R, James SA, Gelfand AE, Miranda ML. A spatial measure of neighborhood level racial isolation applied to low birthweight, preterm birth, and birthweight in North Carolina. *Spat Spatiotemporal Epidemiol.* 2011;2(4):235-246.
2. Reardon SF, O'Sullivan D. Measures of spatial segregation. *Sociological methodology.* 2004;34(1):121-162.
3. Bravo MA, Leong MC, Gelfand AE, Miranda ML. Assessing Disparity Using Measures of Racial and Educational Isolation. *International Journal of Environmental and Public Health Research.* 2021;In press.
4. Watanabe S. Asymptotic equivalence of Bayes cross validation and widely applicable information criterion in singular learning theory. *Journal of Machine Learning Research.* 2010;11:3571-3594.
